# Supplementary material for: Low temperature molten salt synthesis of noncentrosymmetric (NH4)3SbF3(NO3)3and centrosymmetric (NH4)3SbF4(NO3)2
Source: Royal Society of Chemistry journal article supplement (doi:10.1039/d2qi02637f), 2023-01-01
Supplement: d2qi02637f1.pdf [file d2qi02637f1.pdf]

## Electronic Supporting Information

# Low Temperature Molten Salt Synthesis of Noncentrosymmetric $(\text{NH}_4)_3\text{SbF}_3(\text{NO}_3)_3$ and Centrosymmetric $(\text{NH}_4)_3\text{SbF}_4(\text{NO}_3)_2$

Qin Wang, Jinxuan Ren, Dan Wang, Liling Cao, Xuehua Dong, Ling Huang,\* Daojiang Gao, and Guohong Zou\*

### Table of contents

| Sections | Titles                                                                                                                                                     | Pages |
|----------|------------------------------------------------------------------------------------------------------------------------------------------------------------|-------|
| Table S1 | Atomic coordinates and equivalent isotropic displacement parameters for $(\text{NH}_4)_3\text{SbF}_3(\text{NO}_3)_3$ .                                     | S2    |
| Table S2 | Atomic coordinates and equivalent isotropic displacement parameters for $(\text{NH}_4)_3\text{SbF}_4(\text{NO}_3)_2$ .                                     | S3    |
| Table S3 | Selected bond lengths (Å) and angles (deg) for $(\text{NH}_4)_3\text{SbF}_3(\text{NO}_3)_3$ .                                                              | S4    |
| Table S4 | Selected bond lengths (Å) and angles (deg) for $(\text{NH}_4)_3\text{SbF}_4(\text{NO}_3)_2$ .                                                              | S5    |
| Fig. S1  | The crystal photographs of (a) $(\text{NH}_4)_3\text{SbF}_3(\text{NO}_3)_3$ and (b) $(\text{NH}_4)_3\text{SbF}_4(\text{NO}_3)_2$ .                         | S6    |
| Fig. S2  | Experimental and simulated powder XRD patterns for (a) $(\text{NH}_4)_3\text{SbF}_3(\text{NO}_3)_3$ and (b) $(\text{NH}_4)_3\text{SbF}_4(\text{NO}_3)_2$ . | S6    |
| Fig. S3  | TGA curves of (a) $(\text{NH}_4)_3\text{SbF}_3(\text{NO}_3)_3$ and (b) $(\text{NH}_4)_3\text{SbF}_4(\text{NO}_3)_2$ under $\text{N}_2$ atmosphere.         | S7    |
| Fig. S4  | XRD patterns of (a) $(\text{NH}_4)_3\text{SbF}_3(\text{NO}_3)_3$ and (b) $(\text{NH}_4)_3\text{SbF}_4(\text{NO}_3)_2$ after melting.                       | S7    |
| Fig. S5  | IR spectra of compounds (a) $(\text{NH}_4)_3\text{SbF}_3(\text{NO}_3)_3$ and (b) $(\text{NH}_4)_3\text{SbF}_4(\text{NO}_3)_2$ .                            | S8    |
| Fig. S6  | Calculated band structures for (a) $(\text{NH}_4)_3\text{SbF}_3(\text{NO}_3)_3$ and (b) $(\text{NH}_4)_3\text{SbF}_4(\text{NO}_3)_2$ .                     | S8    |

**Table S1.** Atomic coordinates ( $\times 10^4$ ) and equivalent isotropic displacement parameters ( $\text{\AA}^2 \times 10^3$ ) for  $(\text{NH}_4)_3\text{SbF}_3(\text{NO}_3)_3$ .  $U_{\text{eq}}$  is defined as one third of the trace of the orthogonalized  $U_{ij}$  tensor.

| atom | $x$        | $y$         | $z$        | $U_{\text{eq}} (\text{\AA}^2)$ |
|------|------------|-------------|------------|--------------------------------|
| Sb1  | 6394.0 (4) | 5429.5 (14) | 3668.0 (4) | 29.82 (16)                     |
| F1   | 8406 (6)   | 4325 (7)    | 3906 (6)   | 41.0 (11)                      |
| F2   | 5708 (6)   | 3063 (7)    | 4045 (6)   | 44.2 (12)                      |
| O1   | 2264 (11)  | 5440 (30)   | -2068 (10) | 87 (2)                         |
| O2   | 3494 (6)   | 5384 (15)   | 2765 (6)   | 46.9 (13)                      |
| F3   | 6262 (6)   | 4614 (8)    | 1690 (5)   | 42.8 (11)                      |
| N1   | 8690 (9)   | 954 (10)    | 5274 (9)   | 41.4 (18)                      |
| O3   | 7072 (8)   | 5036 (9)    | 6364 (7)   | 47.3 (19)                      |
| N2   | 2999 (8)   | 6547 (11)   | 1850 (7)   | 36.8 (15)                      |
| O4   | 8469(10)   | 6199 (12)   | 8216 (7)   | 58 (2)                         |
| O5   | 1621 (8)   | 6819 (11)   | 1559 (8)   | 53.1 (17)                      |
| N3   | 8099 (9)   | 6132 (10)   | 6893 (8)   | 37.2 (15)                      |
| O6   | 2083 (16)  | 3388 (17)   | -606 (14)  | 96 (3)                         |
| O7   | 3900 (10)  | 7437 (11)   | 1284 (8)   | 49.7 (19)                      |
| N4   | 1919 (9)   | 3862 (11)   | -1839 (8)  | 39.0 (19)                      |
| N5   | 4555 (10)  | 1323 (12)   | 1107 (8)   | 41.0 (16)                      |

**Table S2.** Atomic coordinates ( $\times 10^4$ ) and equivalent isotropic displacement parameters ( $\text{\AA}^2 \times 10^3$ ) for  $(\text{NH}_4)_3\text{SbF}_4(\text{NO}_3)_2$ .  $U_{(\text{eq})}$  is defined as one third of the trace of the orthogonalized  $U_{ij}$  tensor.

| atom | $x$         | $y$         | $z$         | $U_{\text{eq}} (\text{\AA}^2)$ |
|------|-------------|-------------|-------------|--------------------------------|
| Sb1  | 6509.2 (2)  | 7500        | 5167.3 (2)  | 21.65 (7)                      |
| F1   | 7535.3 (9)  | 8611.0 (8)  | 5779.3 (15) | 32.4 (3)                       |
| F2   | 6418.4 (11) | 7500        | 8094 (2)    | 30.6 (4)                       |
| F3   | 7386.8 (13) | 7500        | 2705 (2)    | 36.2 (4)                       |
| O1   | 5851.3 (12) | 5671.4 (13) | 2554 (2)    | 44.3 (4)                       |
| N1   | 7612.3 (15) | 5867.2 (15) | -74 (2)     | 30.6 (4)                       |
| N2   | 5094.1 (12) | 5028.9 (12) | 2632 (2)    | 31.6 (4)                       |
| O2   | 4218.6 (12) | 5316.1 (15) | 2032 (2)    | 55.6 (5)                       |
| O3   | 5227.8 (12) | 4110.9 (12) | 3315 (2)    | 48.6 (4)                       |
| N3   | 4609 (2)    | 7500        | 10275 (4)   | 37.5 (6)                       |

**Table S3.** Selected bond distances (Å) and angles (deg) for (NH<sub>4</sub>)<sub>3</sub>SbF<sub>3</sub>(NO<sub>3</sub>)<sub>3</sub>.

---

|           |            |           |            |
|-----------|------------|-----------|------------|
| Sb1—F1    | 1.967 (5)  | F2—Sb1—F1 | 85.5 (2)   |
| Sb1—F2    | 1.921 (5)  | F2—Sb1—F3 | 86.4 (2)   |
| N2—O5     | 1.240 (10) | F2—Sb1—O3 | 74.2 (2)   |
| N2—O7     | 1.250 (11) | F3—Sb1—F1 | 82.3 (2)   |
| Sb1—F3    | 1.967 (5)  | F3—Sb1—O3 | 153.5 (2)  |
| Sb1—O3    | 2.548 (7)  | N3—O3—Sb1 | 110.2 (5)  |
| O1—N4     | 1.250 (2)  | O2—N2—O7  | 119.6 (8)  |
| O2—N2     | 1.249 (11) | O5—N2—O2  | 118.6 (7)  |
| O3—N3     | 1.265 (10) | O2—N2—O7  | 121.7 (8)  |
| O4—N3     | 1.245 (10) | O4—N3—O3  | 117.7 (8)  |
| N3—O9     | 1.231 (11) | O9—N3—O3  | 119.8 (7)  |
| O6—N4     | 1.212 (15) | O9—N3—O4  | 122.4 (8)  |
| N4—O8     | 1.208 (13) | O6—N4—O1  | 117.2 (10) |
| F1—Sb1—O3 | 78.4 (2)   | O8—N4—O1  | 119.2 (10) |

---

**Table S4.** Selected bond distances (Å) and angles (deg) for (NH<sub>4</sub>)<sub>3</sub>SbF<sub>4</sub>(NO<sub>3</sub>)<sub>2</sub>.

---

|                        |             |                         |             |
|------------------------|-------------|-------------------------|-------------|
| Sb1—F1                 | 1.9407 (10) | F1 <sup>1</sup> —Sb1—F2 | 79.31 (4)   |
| Sb1—F1 <sup>1</sup>    | 1.9407 (10) | F1—Sb1—F2               | 79.31 (4)   |
| Sb1—F2                 | 2.0731 (14) | F1 <sup>1</sup> —Sb1—F3 | 80.04 (5)   |
| Sb1—F3                 | 2.0672 (14) | F1—Sb1—F3               | 80.04 (5)   |
| O1—N2                  | 1.247 (2)   | F3—Sb1—F2               | 150.61 (6)  |
| N2—O2                  | 1.240 (2)   | O2—N2—O1                | 119.45 (17) |
| N2—O3                  | 1.245 (2)   | O2—N2—O3                | 121.03 (17) |
| F1—Sb1—F1 <sup>1</sup> | 90.09 (6)   | O3—N2—O1                | 119.52 (16) |

---

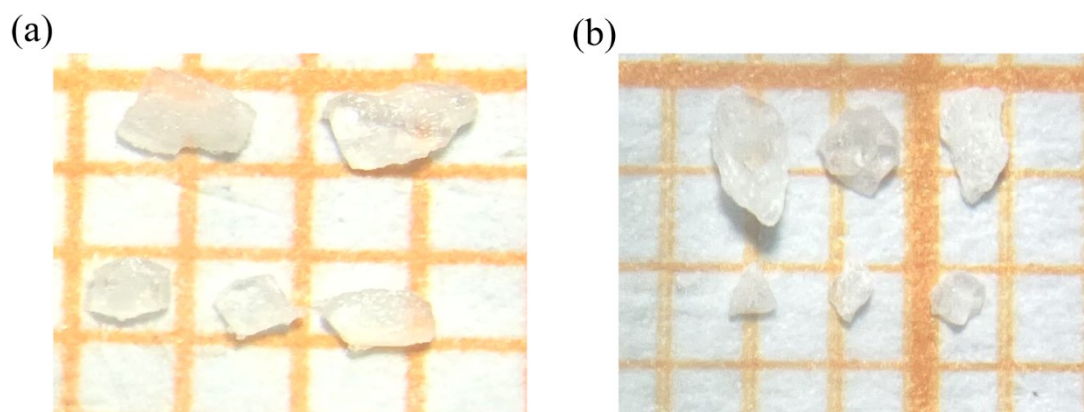

**Fig. S1** The crystal photographs of (a)  $(\text{NH}_4)_3\text{SbF}_3(\text{NO}_3)_3$  and (b)  $(\text{NH}_4)_3\text{SbF}_4(\text{NO}_3)_2$ .

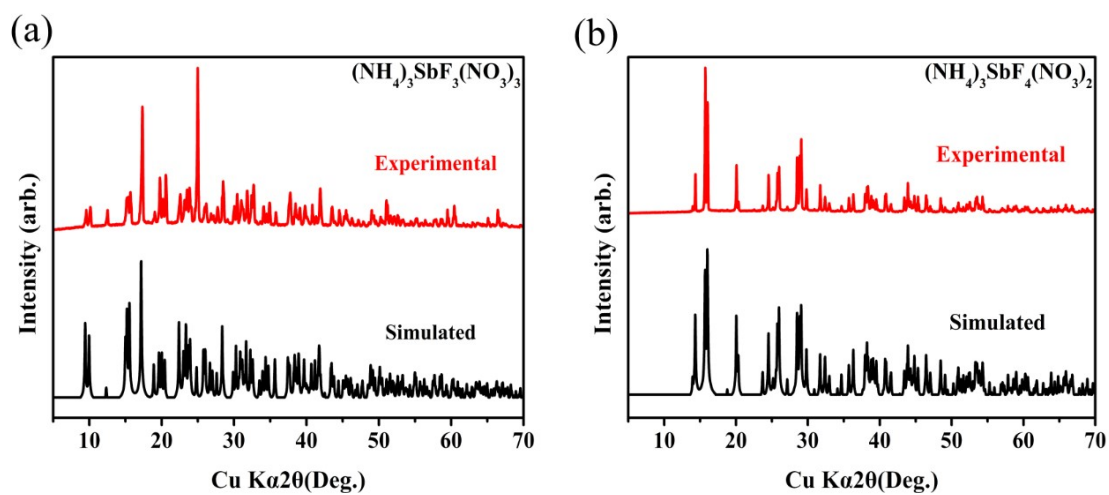

**Fig. S2** Experimental and simulated powder XRD patterns for (a)  $(\text{NH}_4)_3\text{SbF}_3(\text{NO}_3)_3$  and (b)  $(\text{NH}_4)_3\text{SbF}_4(\text{NO}_3)_2$ .

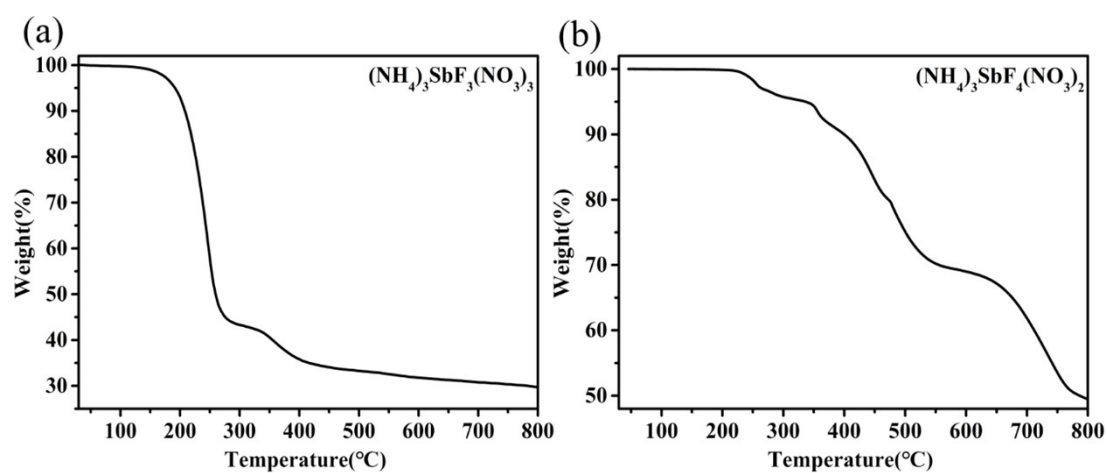

Fig. S3 TGA curves of (a)  $(\text{NH}_4)_3\text{SbF}_3(\text{NO}_3)_3$  and (b)  $(\text{NH}_4)_3\text{SbF}_4(\text{NO}_3)_2$  under  $\text{N}_2$  atmosphere.

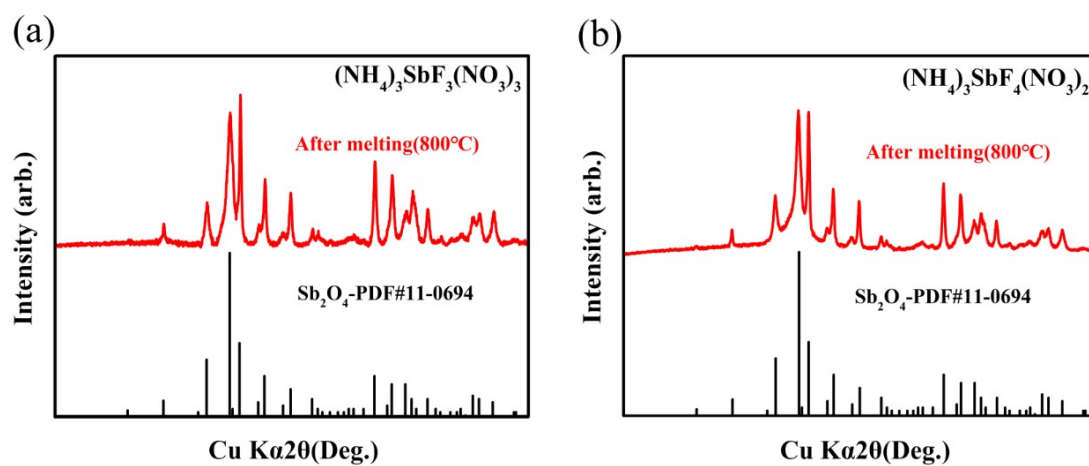

Fig. S4 XRD patterns of (a)  $(\text{NH}_4)_3\text{SbF}_3(\text{NO}_3)_3$  and (b)  $(\text{NH}_4)_3\text{SbF}_4(\text{NO}_3)_2$  after melting.

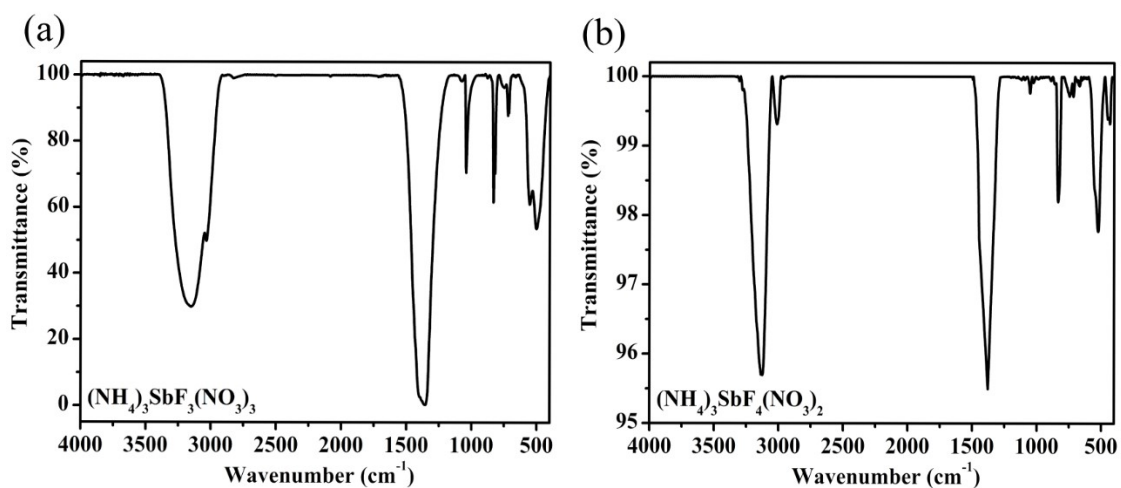

**Fig. S5** IR spectra of compounds (a)  $(\text{NH}_4)_3\text{SbF}_3(\text{NO}_3)_3$  and (b)  $(\text{NH}_4)_3\text{SbF}_4(\text{NO}_3)_2$ .

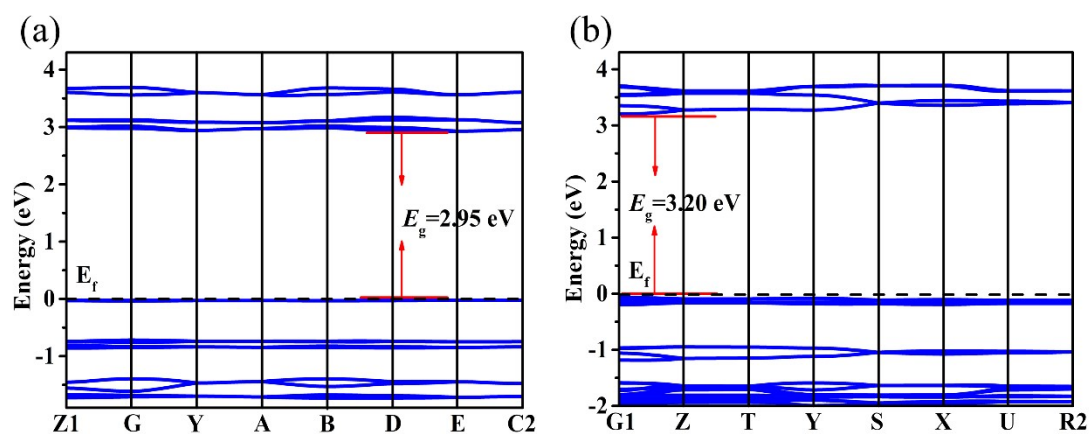

**Fig. S6** Calculated band structures for (a)  $(\text{NH}_4)_3\text{SbF}_3(\text{NO}_3)_3$  and (b)  $(\text{NH}_4)_3\text{SbF}_4(\text{NO}_3)_2$  (the Fermi level is set at 0 eV).
